# Supplementary material for: Spatiotemporal behavior of the far wake of a wind turbine model subjected to harmonic motions: phase averaging applied to stereo particle image velocimetry measurements
Source: Copernicus journal article supplement (doi:10.5194/wes-10-1351-2025), 2025-07-10
Supplement: Supplementary file 1 [file wes-10-1351-2025-supplement.zip]

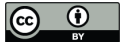

## *Supplement of*

# **Spatiotemporal behavior of the far wake of a wind turbine model subjected to harmonic motions: phase averaging applied to stereo particle image velocimetry measurements**

**Antonin Hubert et al.**

*Correspondence to:* Sandrine Aubrun ([sandrine.aubrun@ec-nantes.fr](mailto:sandrine.aubrun@ec-nantes.fr))

- [wes-10-1351-2025-supplement-title-page.pdf](#)
- [heave-0.09.mp4](#)
- [pitch-0.14.mp4](#)
- [pitch-0.28.mp4](#)
- [surge-0.11.mp4](#)

The copyright of individual parts of the supplement might differ from the article licence.
